# Supplementary material
Source: PubMed Central journal article supplement (PMC2556216)
Supplement: NIHMS50730-supplement-supplement_1.pdf [file NIHMS50730-supplement-supplement_1.pdf]

## 6 SupportingInformation

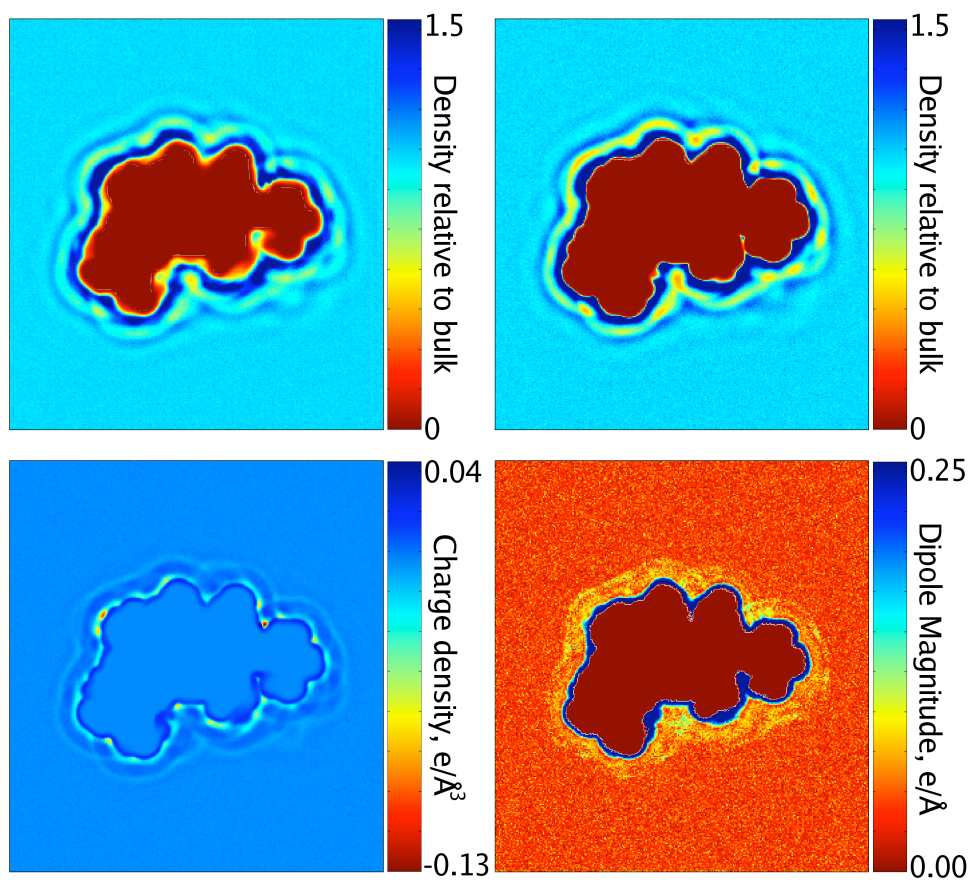

Figure 8: Slices of  $\rho_{\text{HD}}^{(\text{No Q})}$  (upper left panel),  $\rho_{\text{Ox}}^{(\text{No Q})}$  (upper right panel),  $\rho_{\text{Q}}^{(\text{No Q})}$  (lower left panel), and  $\mu^{(\text{No Q})}$  (lower right panel) cutting through the centroid of the protein. These slices correspond to the slice of  $\psi^{(\text{no Q})}$  shown in Figure 1.
